# Supplementary material
Source: PubMed Central journal article supplement (PMC6748807)
Supplement: djy227_supplementary_data.pdf [file djy227_supplementary_data.pdf]

## Supplementary Materials

**Supplementary Table 1. International Classification of Diseases, Sixth Revision (ICD-6) through Tenth Revision (ICD-10), codes for specific causes of death and calendar year of revisions\***

| <b>Label</b>                                  | <b>ICD-6<br/>(1950-57)</b> | <b>ICD-7<br/>(1958-67)</b> | <b>ICD-8<br/>(1968-78)</b> | <b>ICD-9<br/>(1979-98)</b>   | <b>ICD-10<br/>(1999-2014)</b> |
|-----------------------------------------------|----------------------------|----------------------------|----------------------------|------------------------------|-------------------------------|
| All causes of death                           | all                        | all                        | all                        | all                          | all                           |
| Retinoblastoma                                | 192                        | 192                        | 190                        | 190.5,190.9                  | C69.2,C69.9                   |
| All malignant cancer excluding retinoblastoma | 140-205 excl.<br>192       | 140-207 excl.<br>192       | 140-207 excl.<br>190       | 140-208 excl.<br>190.5,190.9 | C00-C97 excl.<br>C69.2,C69.9  |
| Cancer of bone                                | 196                        | 196                        | 170                        | 170                          | C40-C41                       |
| Benign bone cancer                            | <not<br>available>         | <not<br>available>         | 213                        | 213                          | D16                           |
| Cancer of soft tissue/connective tissue       | 197                        | 197                        | 171                        | 171                          | C49                           |
| Benign lipoma                                 | <not<br>available>         | <not<br>available>         | 214                        | 214                          | D17                           |
| Benign soft tissue/connective tissue          | <not<br>available>         | <not<br>available>         | 215                        | 215                          | D19-D21                       |
| Melanoma                                      | 190                        | 190                        | 172                        | 172                          | C43                           |
| Benign melanoma (skin nevi)                   | <not<br>available>         | <not<br>available>         | 216                        | 216                          | D22                           |
| Cancer of brain/CNS, total                    | 193                        | 193                        | 191-192                    | 191-192                      | C70-C72                       |
| Benign brain/CNS, total                       | <not<br>available>         | <not<br>available>         | 225                        | 225                          | D32-D33                       |
| Benign CNS (meningioma)                       | <not<br>available>         | <not<br>available>         | 225.2,225.4                | 225.2,225.4                  | D32                           |
| Cancer of brain                               | <not<br>available>         | 193.0                      | 191                        | 191                          | C71                           |
| Benign brain                                  | <not<br>available>         | <not<br>available>         | 225.0                      | 225.0                        | D33.0-D33.2                   |
| Cancer of pineal gland                        | <not<br>available>         | 195.4                      | 194                        | 194                          | C75                           |
| Cancer of lung/trachea                        | 162-163                    | 162-163                    | 162                        | 162                          | C33-C34                       |
| Benign lung                                   | <not<br>available>         | <not<br>available>         | 212.3                      | 212.3                        | D14.3                         |
| Cancer of nasal cavities/middle ear/sinus     | 160                        | 160                        | 160                        | 160                          | C30-C31                       |
| Cancer of corpus uteri                        | 172-174                    | 172-174                    | 182                        | 179,182                      | C54-C55                       |
| Benign uterine leiomyoma                      | <not<br>available>         | <not<br>available>         | 218                        | 218                          | D25                           |
| Benign uterus other                           | <not<br>available>         | <not<br>available>         | 219                        | 219                          | D26                           |
| Cancer of ovary                               | 175                        | 175                        | 183                        | 183                          | C56-C57                       |
| Benign ovary                                  | <not<br>available>         | <not<br>available>         | 220                        | 220                          | D27                           |
| Cancer of retroperitoneum                     | 158                        | 158                        | 158                        | 158                          | C48                           |
| Cancer of breast                              | 170                        | 170                        | 174                        | 174-175                      | C50                           |

|                                                         |                 |                 |                 |                     |                 |
|---------------------------------------------------------|-----------------|-----------------|-----------------|---------------------|-----------------|
| Benign breast                                           | <not available> | <not available> | 217             | 217                 | D24             |
| Cancer of buccal cavity/pharynx                         | 140-149         | 140-149         | 140-149         | 140-149             | C00-C14         |
| Benign buccal cavity                                    | <not available> | <not available> | 210             | 210                 | D10             |
| Lymphoma and hematopoietic                              | 200-205         | 200-207         | 200-207         | 200-208             | C81-C96         |
| Benign hemangioma and lymphangioma                      | <not available> | <not available> | 227             | 228                 | D18             |
| Cancer of thyroid                                       | 194             | 194             | 193             | 193                 | C73             |
| Cancer of bladder                                       | 181             | 181             | 188             | 188                 | C67             |
| Cancer of esophagus                                     | 150             | 150             | 150             | 150                 | C15             |
| Cancer of stomach                                       | 151             | 151             | 151             | 151                 | C16             |
| Cancer of large intestine                               | 153             | 153             | 153             | 153                 | C18             |
| Benign large intestine                                  | <not available> | <not available> | 211.3           | 211.3               | D12.0-D12.6     |
| Cancer of liver/gallbladder                             | 155             | 155             | 155-156         | 155-156             | C22-C24         |
| Cancer of larynx                                        | 161             | 161             | 161             | 161                 | C32             |
| Cancer of pancreas                                      | 157             | 157             | 157             | 157                 | C25             |
| Cancer of testis                                        | 178             | 178             | 186             | 186                 | C62             |
| Cancer of prostate                                      | 177             | 177             | 185             | 185                 | C61             |
| Cancer of rectum                                        | 154             | 154             | 154             | 154 excl. 154.3     | C19-C21         |
| Benign rectum                                           |                 |                 |                 |                     |                 |
| Cancer of kidney                                        | 180             | 180             | 189             | 189                 | C64-C66         |
| All benign neoplasms                                    | <not available> | <not available> | 210-229         | 210-229             | D10-D36         |
| All non-cancer causes of death                          | <not available> | <not available> | 001-139,240-999 | 000-139,240-999     | A00-B99,D50-Y89 |
| All infectious and parasitic disease                    | <not available> | <not available> | 001-139         | 000-139             | A00-B99         |
| Allergic, endocrine, metabolic, and nutritional disease | <not available> | <not available> | 240-279         | 240-279             | E00-E89         |
| Mental, psychoneurotic, and personality disorders       | <not available> | <not available> | 290-319         | 290-319             | F00-F99         |
| All diseases of nervous system and sense organs         | <not available> | <not available> | 320-389         | 320-389             | G00-G99         |
| All diseases of circulatory system                      | <not available> | <not available> | 390-459         | 390-459             | I00-I99         |
| Arteriosclerotic heart disease including CHD            | <not available> | <not available> | 410-414         | 410-414,429.2       | I21-I25,I51.6   |
| All vascular lesions of central nervous system          | <not available> | <not available> | 430-438         | 430-438             | I60-I69         |
| All respiratory diseases                                | <not available> | <not available> | 460-519         | 460-519             | J00-J98         |
| All diseases of digestive system                        | <not available> | <not available> | 520-579         | 520-579             | K00-K92         |
| All diseases of blood and blood-forming organs          | <not available> | <not available> | 280-289         | 280-289 excl. 289.8 | D50-D89         |
| All diseases of bones and organs of movement            | <not available> | <not available> | 710-739         | 710-739             | M00-M99         |
| All diseases of skin and cellular tissue                | <not available> | <not available> | 680-709         | 680-709             | L00-L98         |

|                                                |                 |                 |         |         |         |
|------------------------------------------------|-----------------|-----------------|---------|---------|---------|
| All external causes of death                   | <not available> | <not available> | 800-999 | 800-999 | V01-Y89 |
| Symptoms, senility, and ill-defined conditions | <not available> | <not available> | 780-799 | 780-799 | R00-R99 |

---

\*CHD=coronary heart disease; CNS=central nervous system

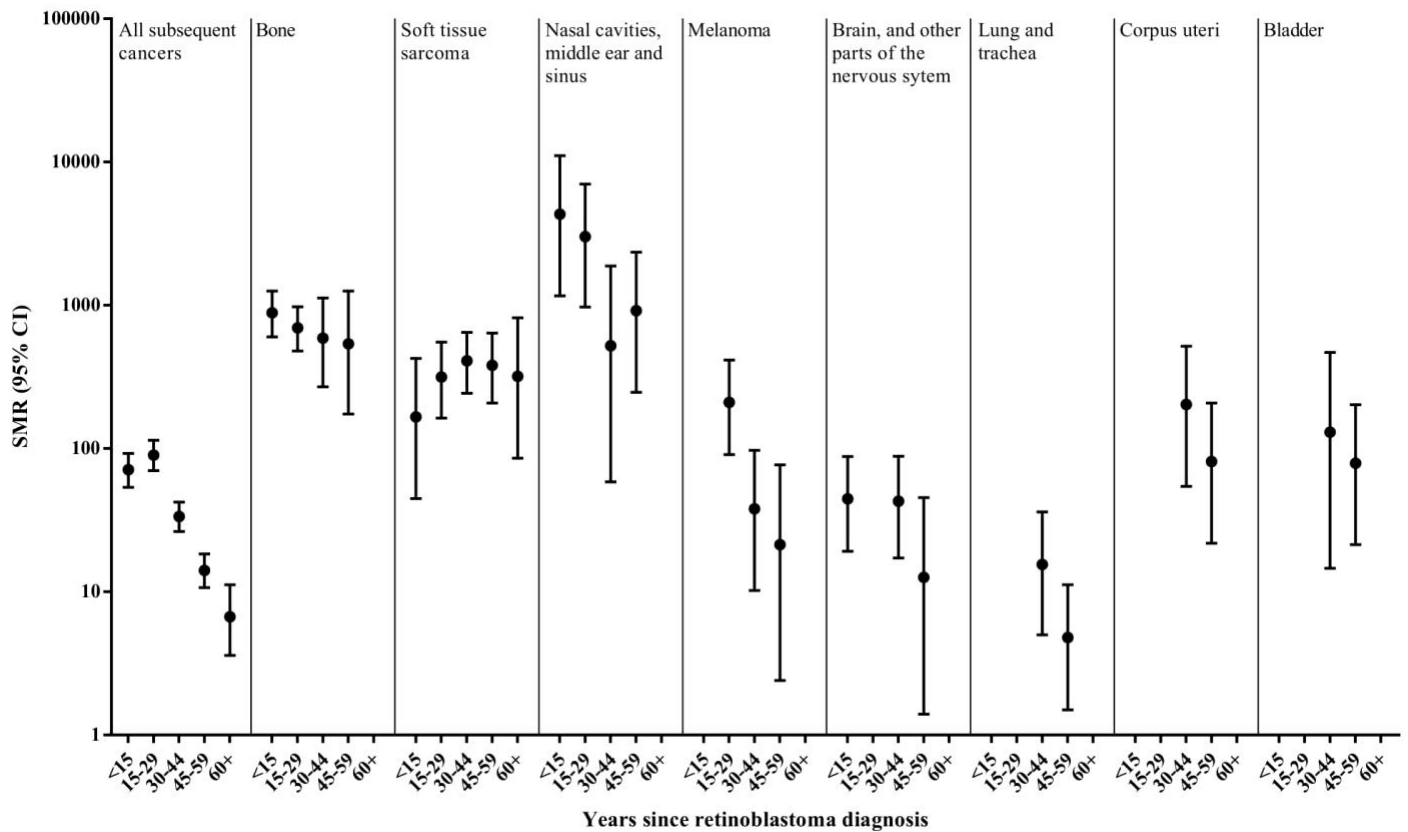

**Supplementary Figure 1. Standardized mortality ratios (SMRs) by years since hereditary retinoblastoma diagnosis for subsequent cancers, overall and by type. Error bars represent 95% confidence intervals (CIs).**

**Supplementary Table 2. Cumulative mortality and person-years at risk for retinoblastoma, subsequent cancer and non-cancer causes**

| Patients at Risk<br>(Number of Deaths) | Years since retinoblastoma |              |             |              |             |              |             |              |             |              |             |              |             |  |
|----------------------------------------|----------------------------|--------------|-------------|--------------|-------------|--------------|-------------|--------------|-------------|--------------|-------------|--------------|-------------|--|
|                                        | 0-9 years                  |              | 10-19 years |              | 20-29 years |              | 30-39 years |              | 40-49 years |              | 50-59 years |              | 60-69 years |  |
| Non-hereditary retinoblastoma          | 924 (103)                  |              | 801 (9)     |              | 721 (11)    |              | 606 (11)    |              | 448 (11)    |              | 250 (6)     |              | 98 (14)     |  |
| Hereditary retinoblastoma              | 1129 (192)                 |              | 919 (95)    |              | 762 (52)    |              | 626 (64)    |              | 428 (63)    |              | 212 (36)    |              | 60 (12)     |  |
| Cause of Death                         |                            |              |             |              |             |              |             |              |             |              |             |              |             |  |
| Non-hereditary retinoblastoma          | CM*                        | (95% CI)     | CM          |  |
| All-causes of death                    | 11.3                       | (9.2, 13.3)  | 12.3        | (10.2, 14.5) | 13.8        | (11.5, 16.0) | 15.5        | (13.1, 17.9) | 18.3        | (15.4, 21.2) | 21.8        | (18.0, 25.6) | 35.1        |  |
| Retinoblastoma                         | 9.0                        | (7.1, 10.8)  | 9.1         | (7.2, 10.9)  | 9.1         | (7.2, 10.9)  | 9.1         | (7.2, 10.9)  | 9.1         | (7.2, 10.9)  | 9.1         | (7.2, 10.9)  | 9.1         |  |
| Subsequent cancer                      | 0.1                        | -(0.1, 0.3)  | 0.5         | (0.0, 0.9)   | 0.9         | (0.2, 1.5)   | 1.0         | (0.3, 1.7)   | 2.3         | (1.0, 3.6)   | 5.2         | (2.5, 8.0)   | 8.9         |  |
| Non-cancer causes                      | 1.2                        | (0.5, 1.9)   | 1.8         | (0.9, 2.7)   | 2.8         | (1.7, 4.0)   | 4.3         | (2.8, 5.7)   | 5.6         | (3.7, 7.4)   | 6.1         | (4.0, 8.2)   | 13.4        |  |
| Hereditary retinoblastoma              |                            |              |             |              |             |              |             |              |             |              |             |              |             |  |
| All-causes of death                    | 17.3                       | (15.1, 19.5) | 26.0        | (23.4, 28.6) | 31.4        | (28.6, 34.2) | 39.5        | (36.4, 42.6) | 50.5        | (46.9, 54.1) | 63.5        | (58.9, 68.2) | 75.8        |  |
| Retinoblastoma                         | 13.0                       | (11.0, 15.0) | 14.5        | (12.4, 16.5) | 15.3        | (13.2, 17.4) | 15.8        | (13.6, 18.0) | 17.0        | (14.7, 19.3) | 17.9        | (15.3, 20.5) | 17.9        |  |
| Subsequent cancer                      | 1.9                        | (1.1, 2.7)   | 7.9         | (6.3, 9.6)   | 11.9        | (9.9, 13.8)  | 18.4        | (15.9, 20.9) | 27.4        | (24.2, 30.7) | 36.7        | (32.3, 41.1) | 48.3        |  |
| Non-cancer causes                      | 1.6                        | (0.9, 2.3)   | 2.4         | (1.5, 3.2)   | 2.8         | (1.8, 3.7)   | 3.5         | (2.4, 4.6)   | 4.2         | (2.9, 5.6)   | 6.7         | (4.5, 9.0)   | 7.4         |  |

\* CM=cumulative mortality; CI=confidence interval.
